# Supplementary material for: Cobalt(iii)porphyrin to target G-quadruplex DNA
Source: Royal Society of Chemistry journal article supplement (doi:10.1039/c4dt03631j), 2015-01-01
Supplement: c4dt03631j1.pdf [file c4dt03631j1.pdf]

# SUPPLEMENTARY INFORMATION

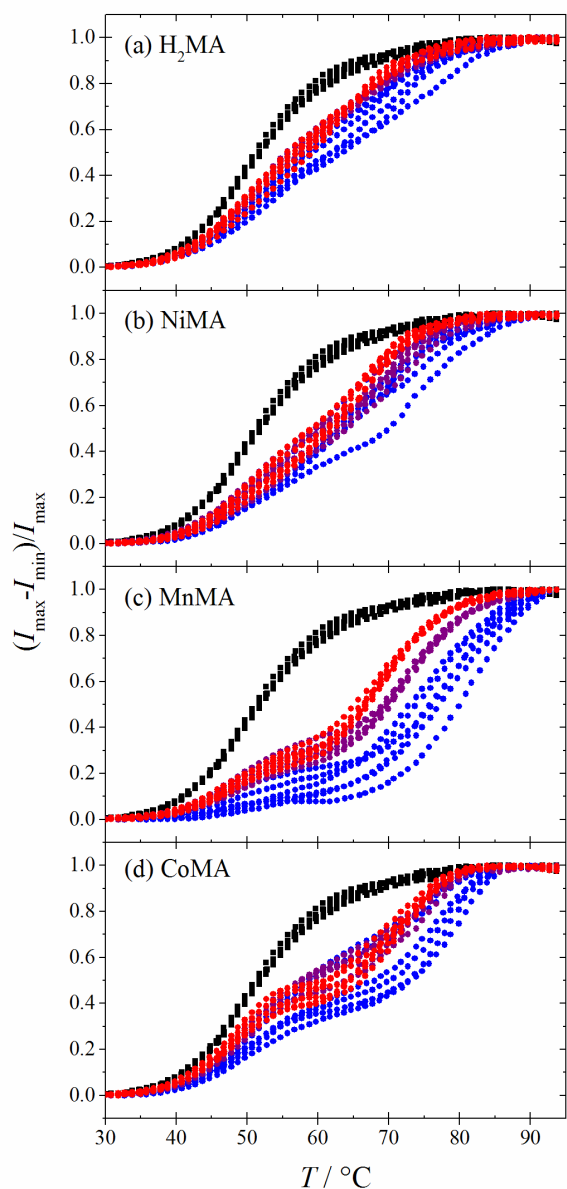

**Figure S1. G-quadruplex FRET-melting assay.** Melting profiles of the human telomeric F21T sequence (0.2  $\mu\text{M}$ ) in the absence (black squares) or presence (blue circles) of 0.5  $\mu\text{M}$  of the synthesized porphyrins in 10 mM lithium cacodylate pH 7.2 containing 10 mM K<sup>+</sup> (+90 mM Li<sup>+</sup>). The profiles obtained with the ligand and 3 or 10  $\mu\text{M}$  of duplex competitor (ds26) are represented with purple or red circles respectively.

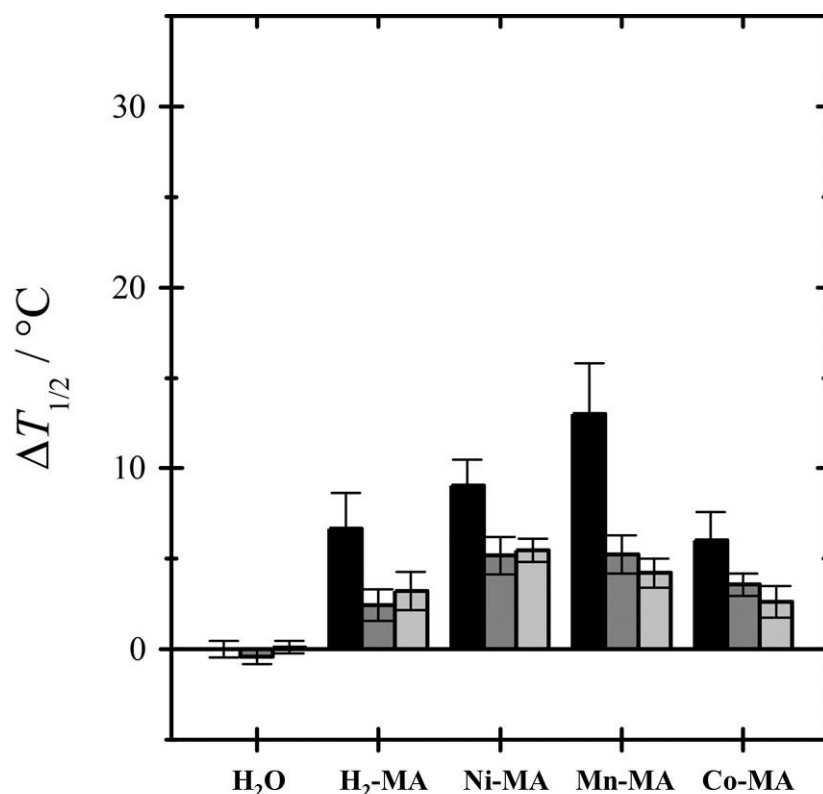

**Figure S2. FRET-melting competition assay.** Thermal stabilization induced by the synthesized porphyrins (0.5  $\mu\text{M}$ ) on the human telomeric quadruplex F21T (0.2  $\mu\text{M}$ ) in 10 mM lithium cacodylate pH 7.2 containing 100 mM NaCl. The duplex competitor (ds26) strand concentrations are 0 (black), 3 (dark grey) and 10  $\mu\text{M}$  (light grey).

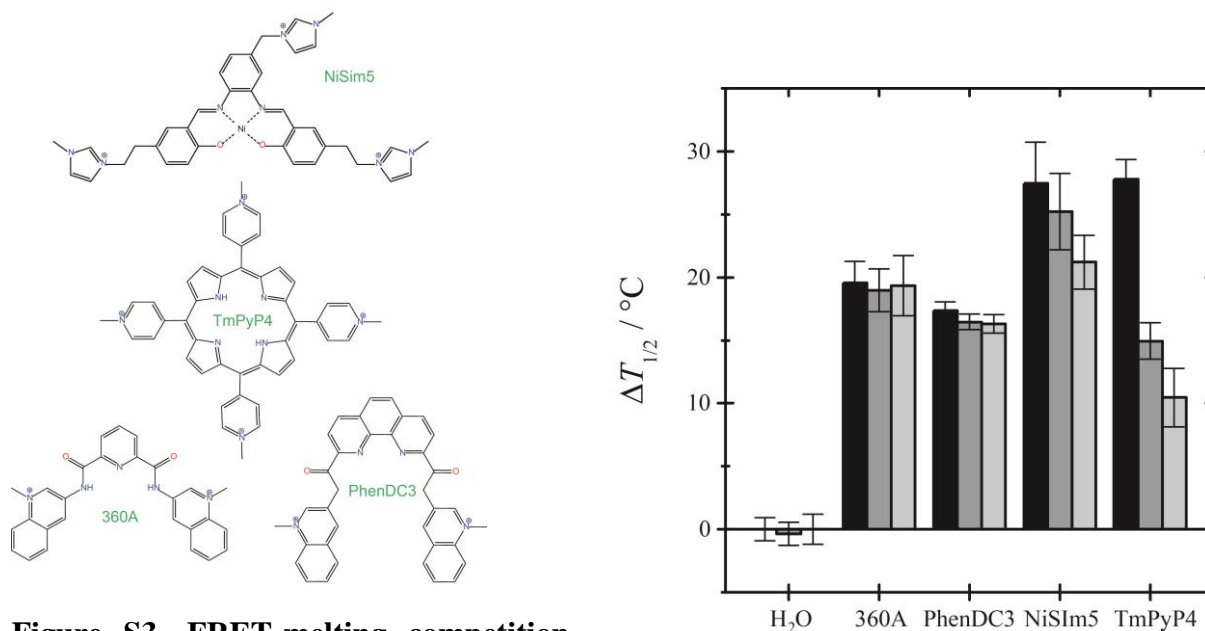

**Figure S3. FRET-melting competition assay.** Thermal stabilization induced by known G-quadruplex ligands (0.5  $\mu\text{M}$ ) on the human telomeric quadruplex F21T (0.2  $\mu\text{M}$ ) in 10 mM lithium cacodylate pH 7.2 containing 10 mM KCl and 90 mM LiCl. The duplex competitor (ds26) strand concentrations are 0 (black), 3 (dark grey) and 10  $\mu\text{M}$  (light grey).

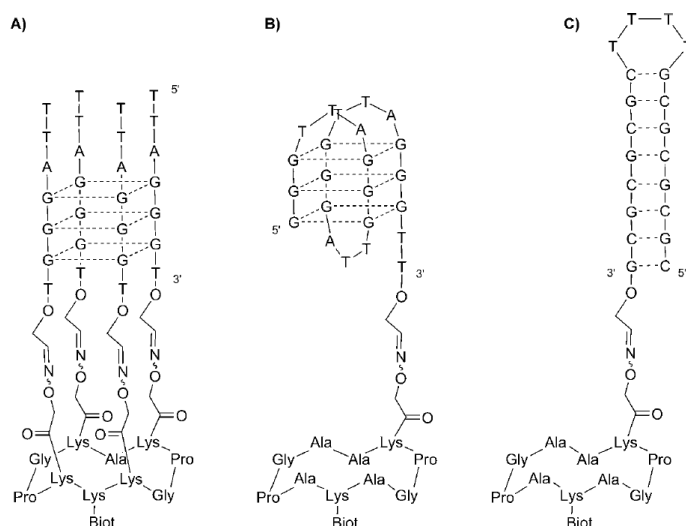

**Figure S4.** Biomolecular systems containing different DNA structures: A) parallel-stranded quadruplex (intermolecular like G-quadruplex) B) intermolecular folded quadruplex (intramolecular like-G-quadruplex) and C) duplex (hairpin)

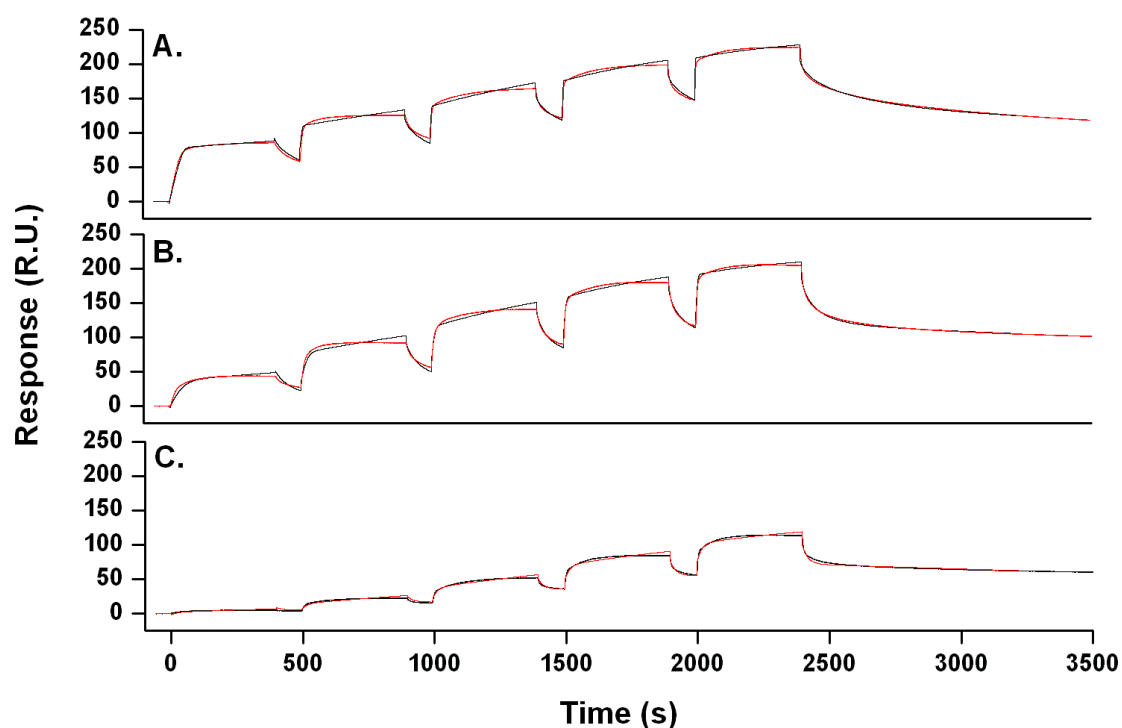

**Figure S5.** Kinetic titration analysis for the **Co-MA** interaction with A) the intermolecular-like quadruplex, B) the intramolecular-like quadruplex and C) the hairpin duplex. The interaction of **Co-MA** with the different DNA structures was tested at concentrations of 100 nM, 250, 500, 750 and 1000 nM. Sensorgrams corresponded to double subtracted data (blank and reference subtraction).

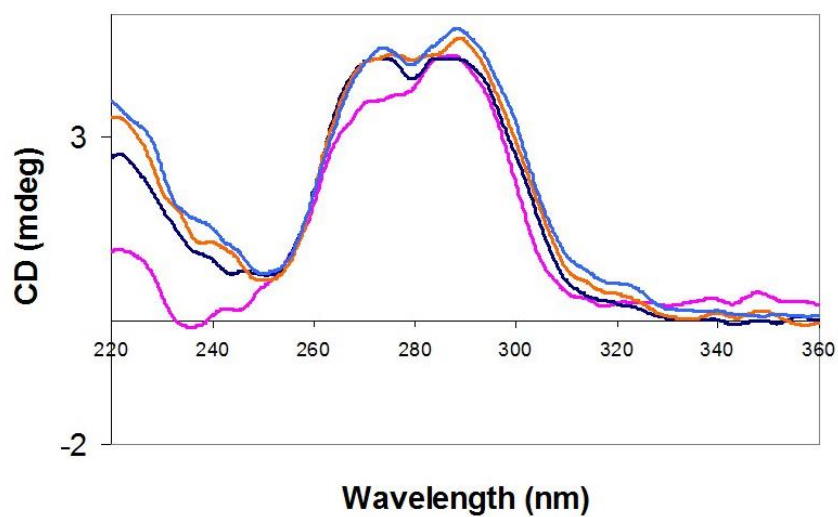

**Figure S6.** CD spectra of DNA model oligonucleotide 5'-TT(GGGTTA)<sub>3</sub>GGGA (1 μM) in the absence (pink) and in the presence of **Co-MA** 1, 3 and 5 μM (black, orange, and blue, respectively) in 20 mM phosphate buffer pH 7.0, KCl 70 mM.

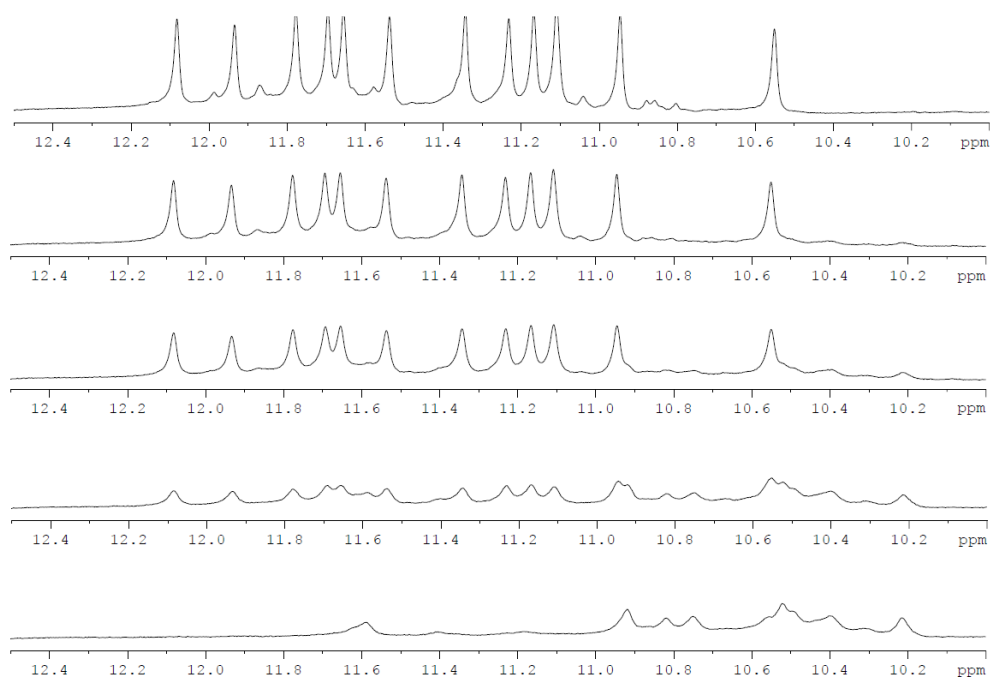

**Fig. S7.** 1D  $^1\text{H}$  NMR titration of **Co-MA** and 5'-TT(GGGTTA)<sub>3</sub>GGGA quadruplex DNA in 16 mM phosphate buffer pH 7.0, KCl 100 mM. Top spectrum corresponds to only DNA. Then, from top to bottom DNA:Co-MA ratio is 4:1, 2:1, 1:1, and 1:1.5.
